# Supplementary material
Source: Springer Nature journal article supplement (https://www.springermedizin.de/resource/supplementary/13690_2013_5047_MOESM1_ESM.pdf/9685622)
Supplement: MOESM1 [file 9685622]

A - Maternal iodine stocks are sufficient

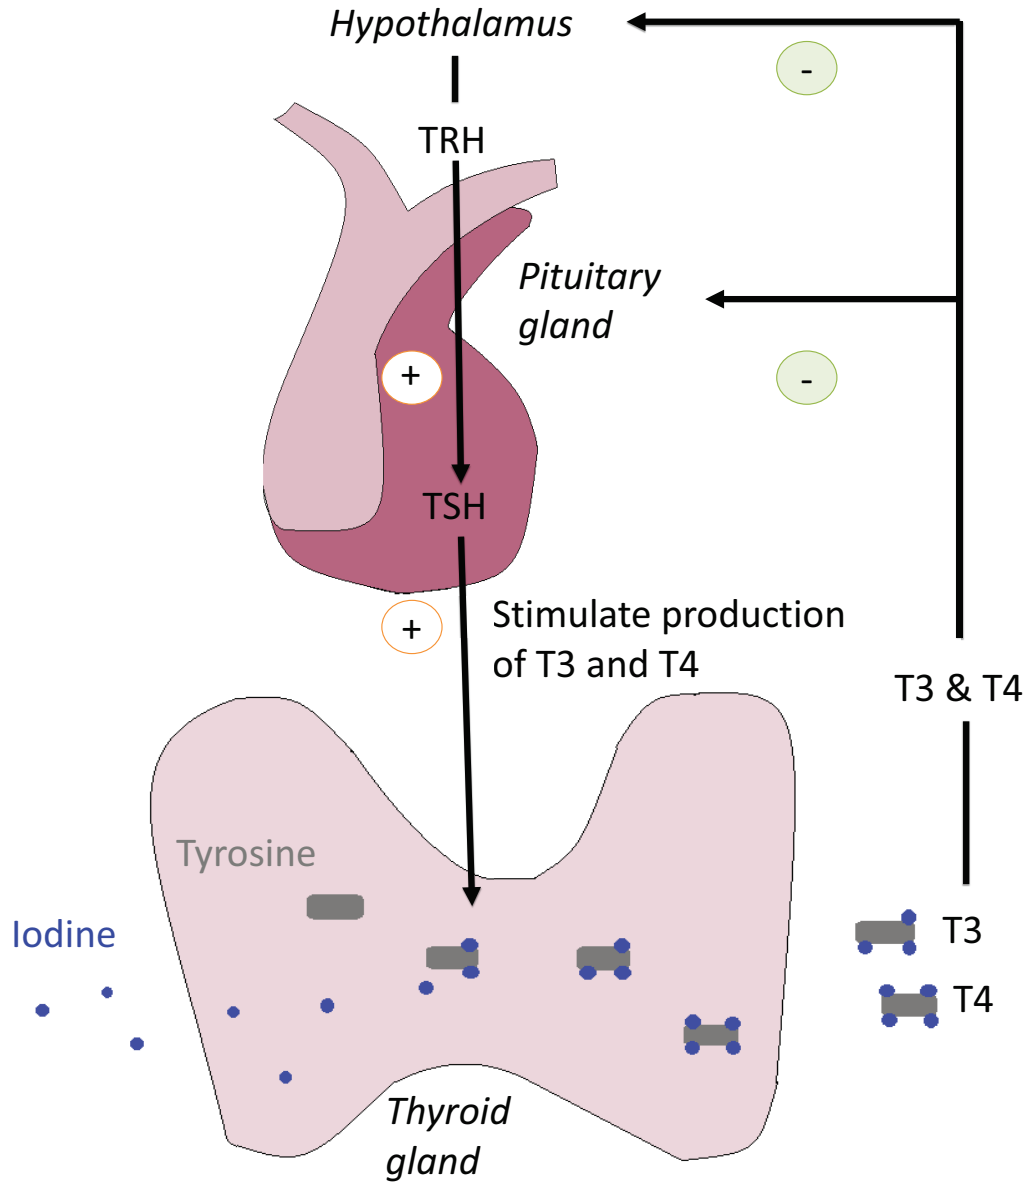

B - Maternal iodine stocks are insufficient

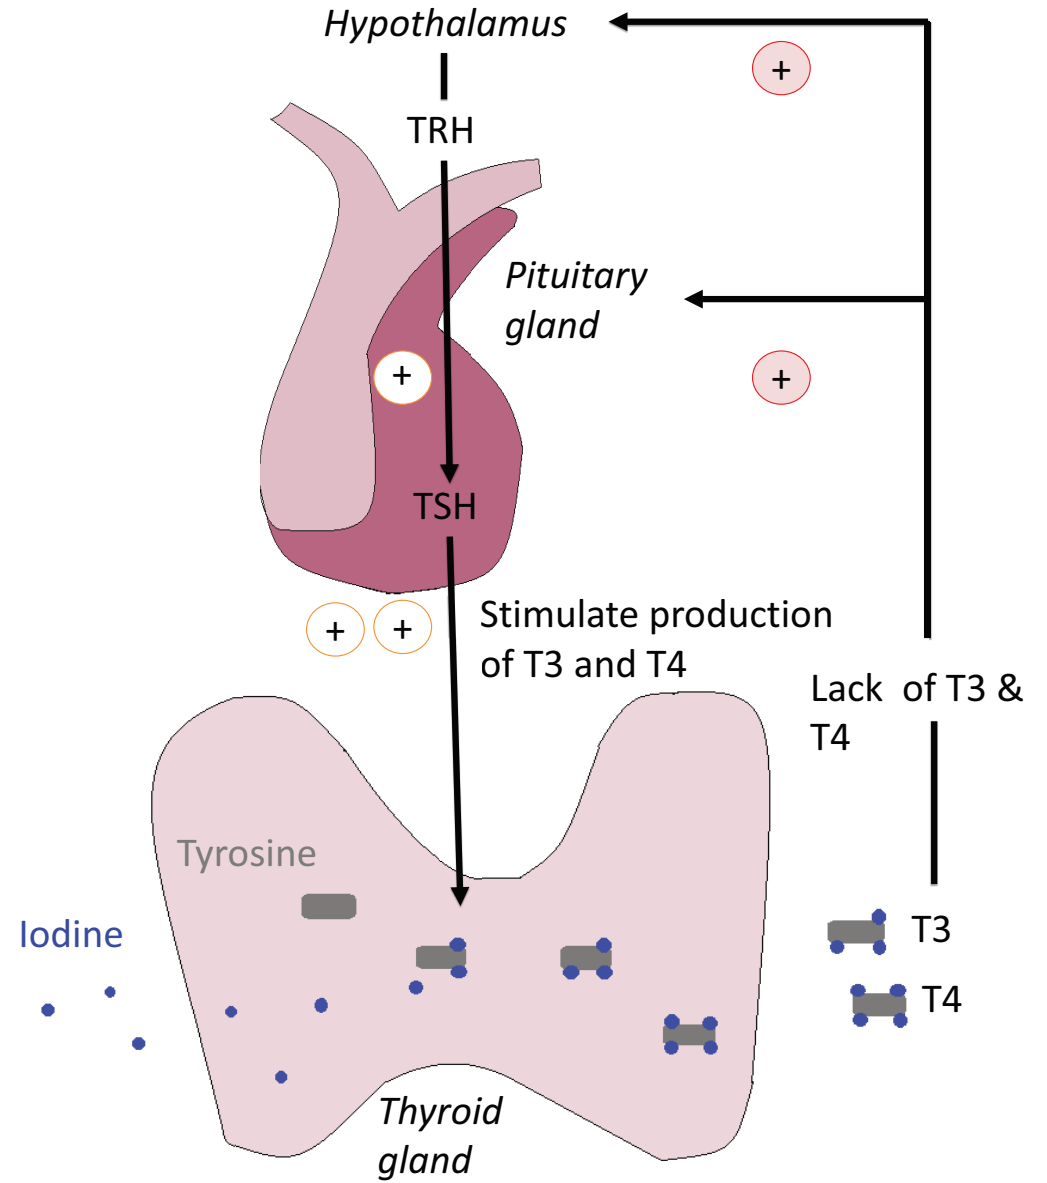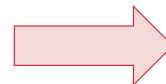

Elevation of TSH in bloodstream
